# Supplementary material for: Three different co-crystalline phases of syndiotactic polystyrene with a nitroxide radical
Source: Royal Society of Chemistry journal article supplement (doi:10.1039/c0ce00128g), 2010-01-01
Supplement: c0ce00128g.pdf [file c0ce00128g.pdf]

## Electronic Supplementary Information:

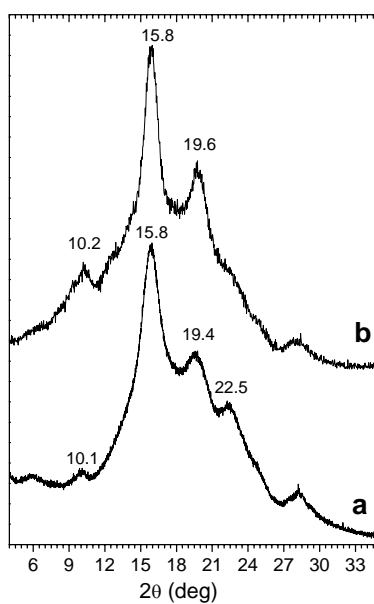

Figure S1. X-ray diffraction patterns, as collected by an automatic powder diffractometer of PS/TEMPO co-crystalline powder samples as obtained by sorption of TEMPO (20% wt/wt chloroform solution) in: (a) amorphous, (b)  $\epsilon$  nanoporous form.
